# Supplementary material
Source: PubMed Central journal article supplement (PMC3586676)

## Figure S1

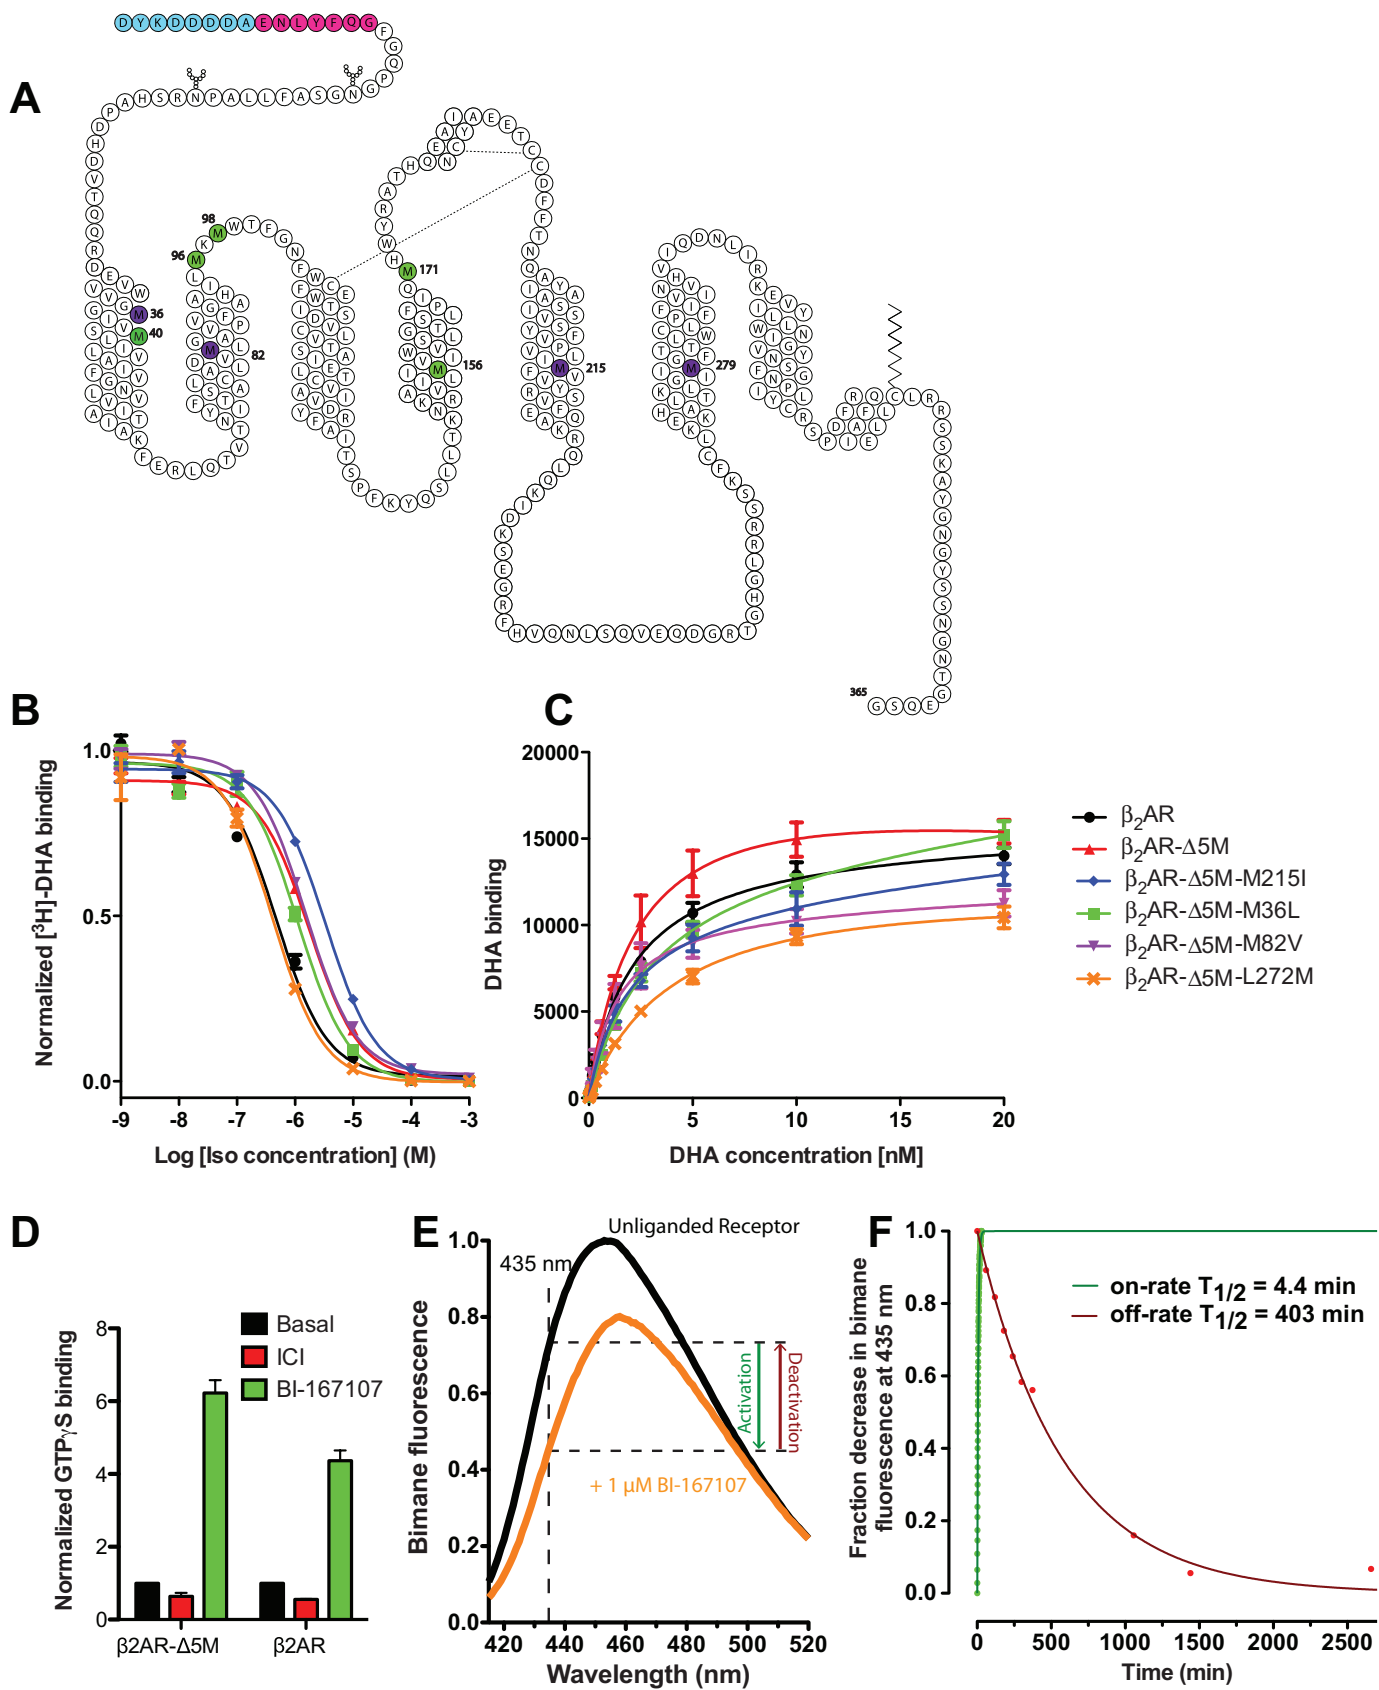

Figure S2

**A**

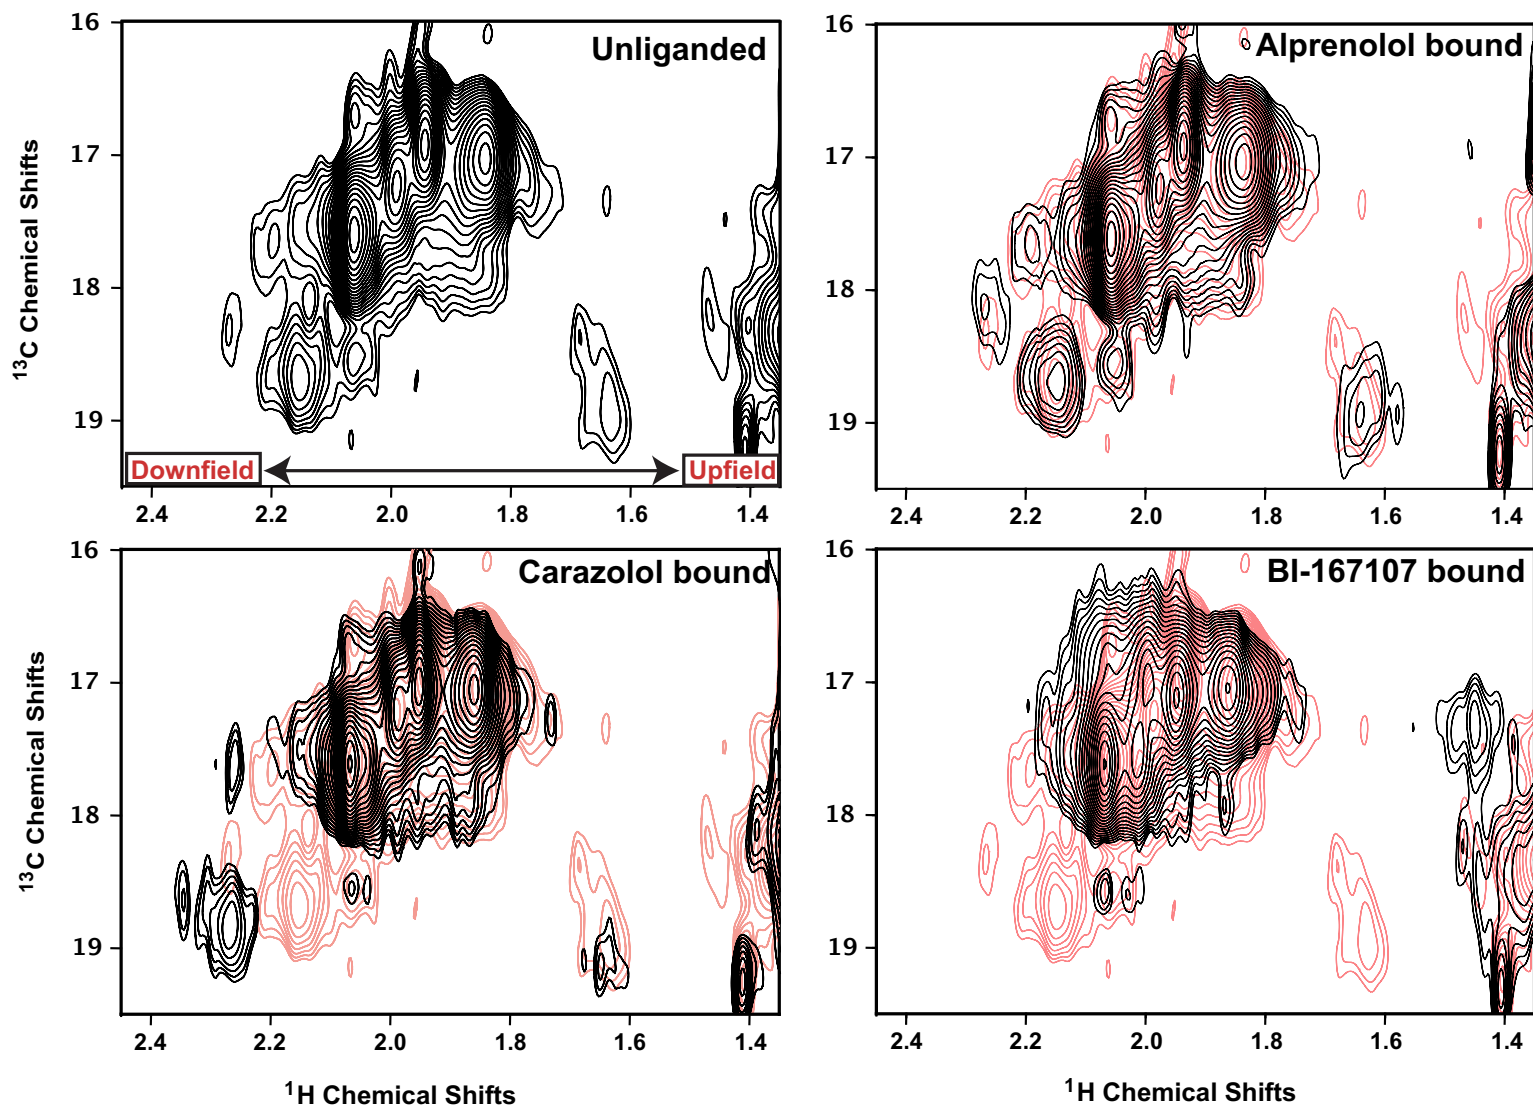

**B**

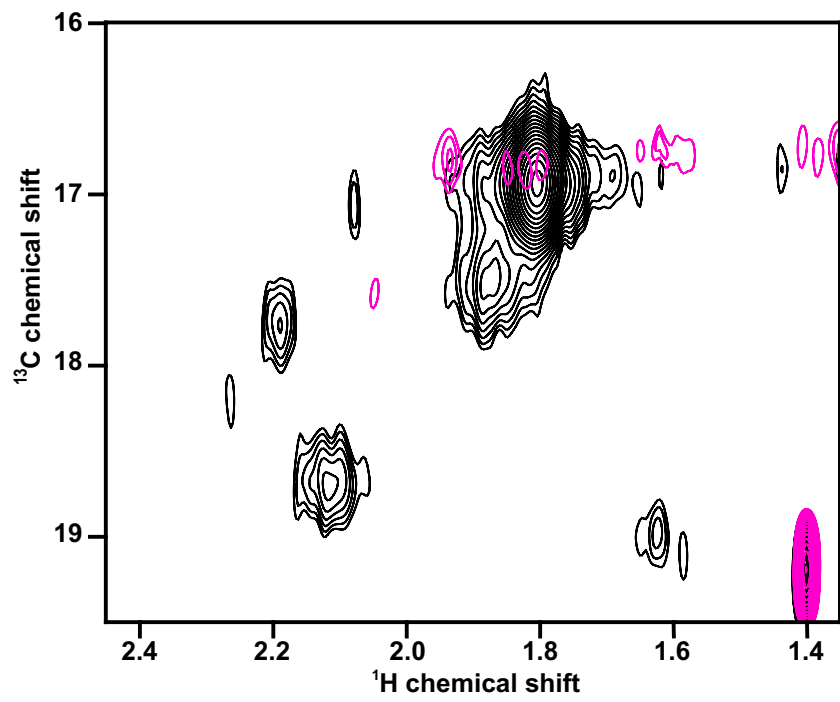

## Figure S3

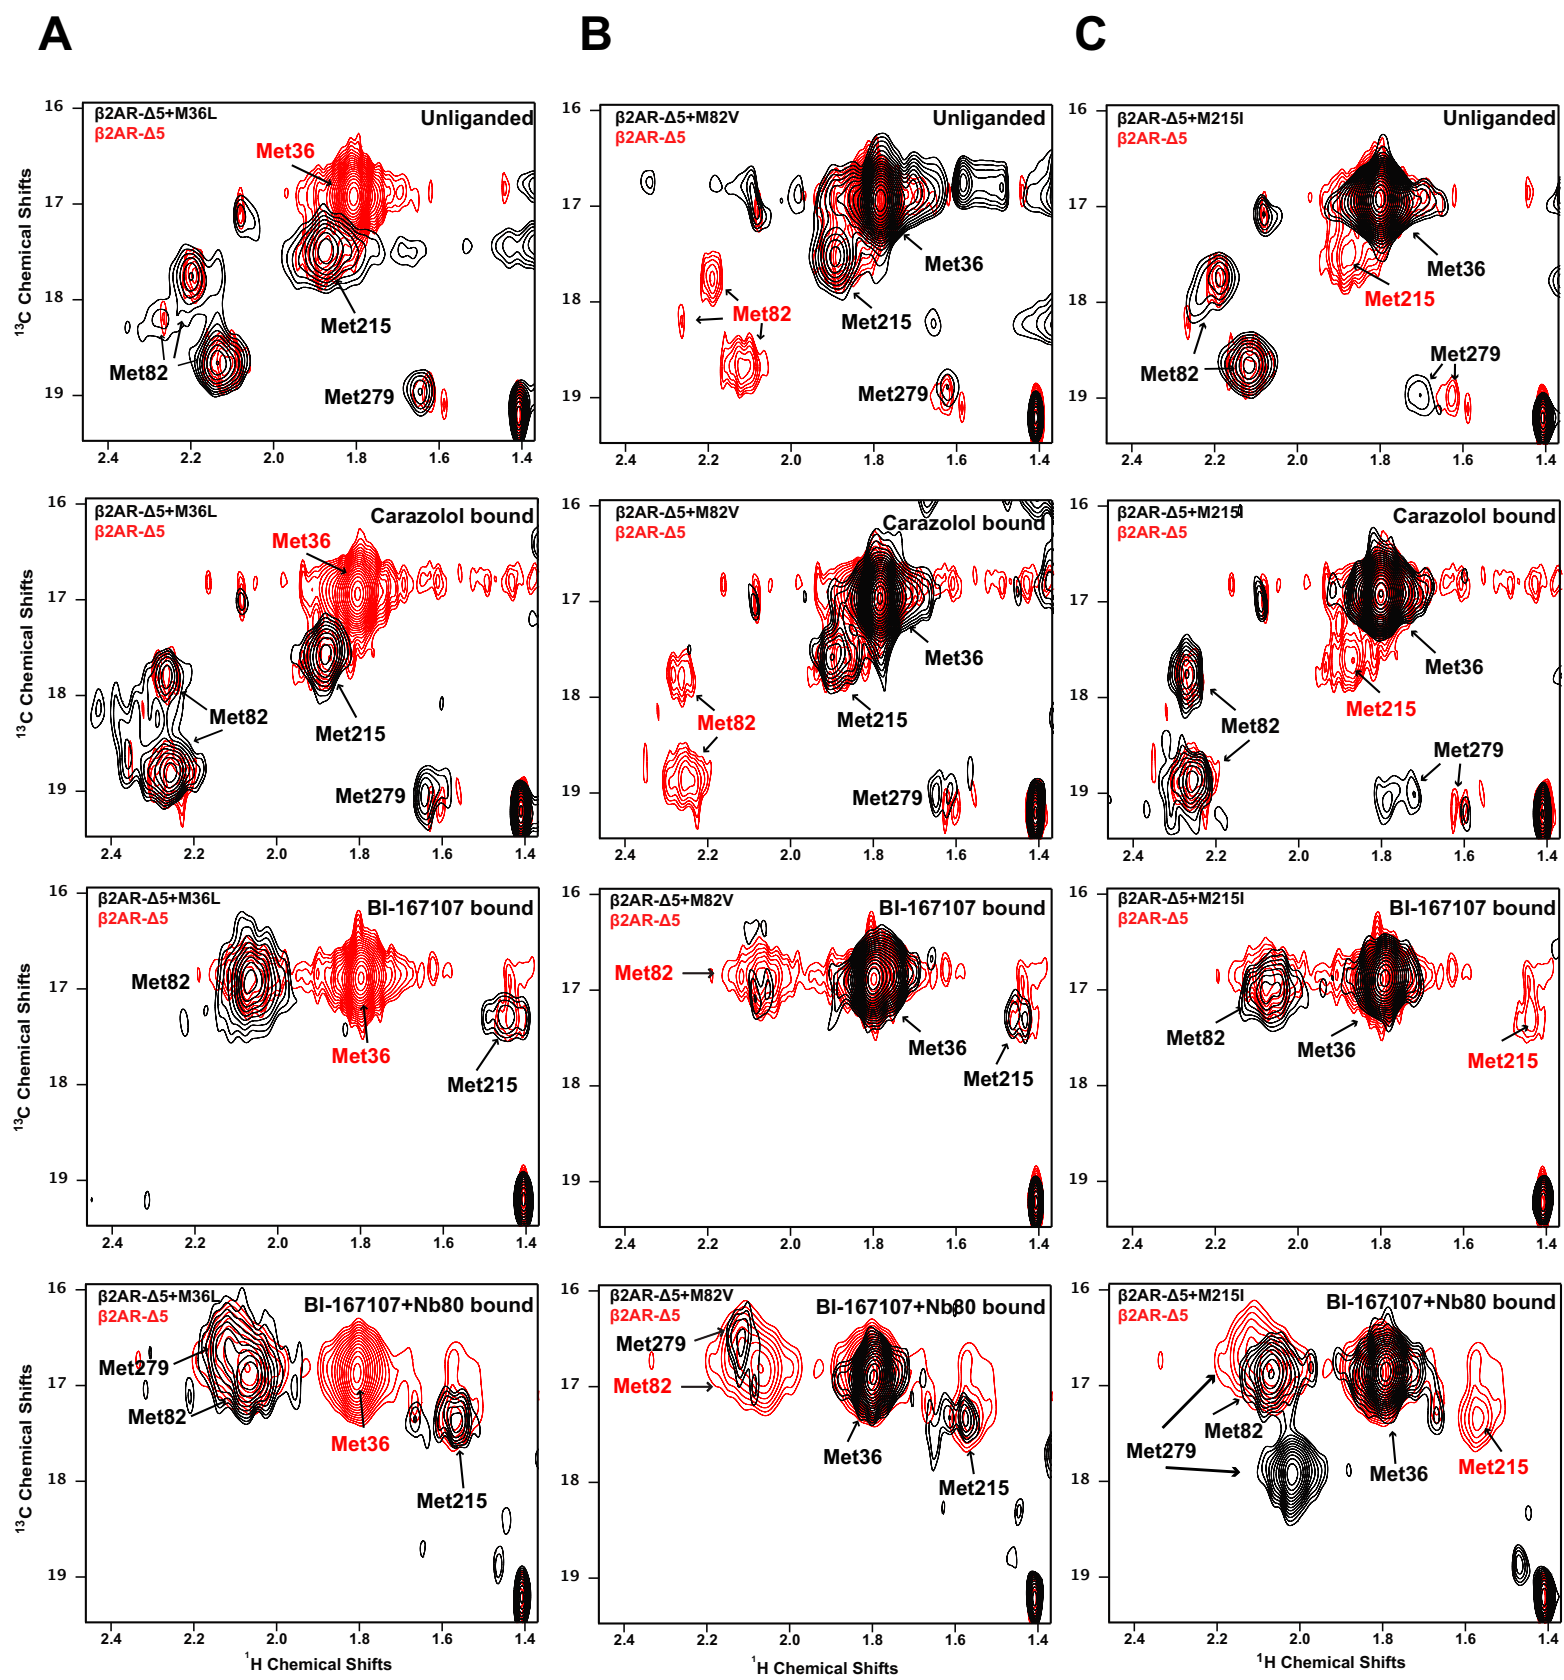

## Figure S4

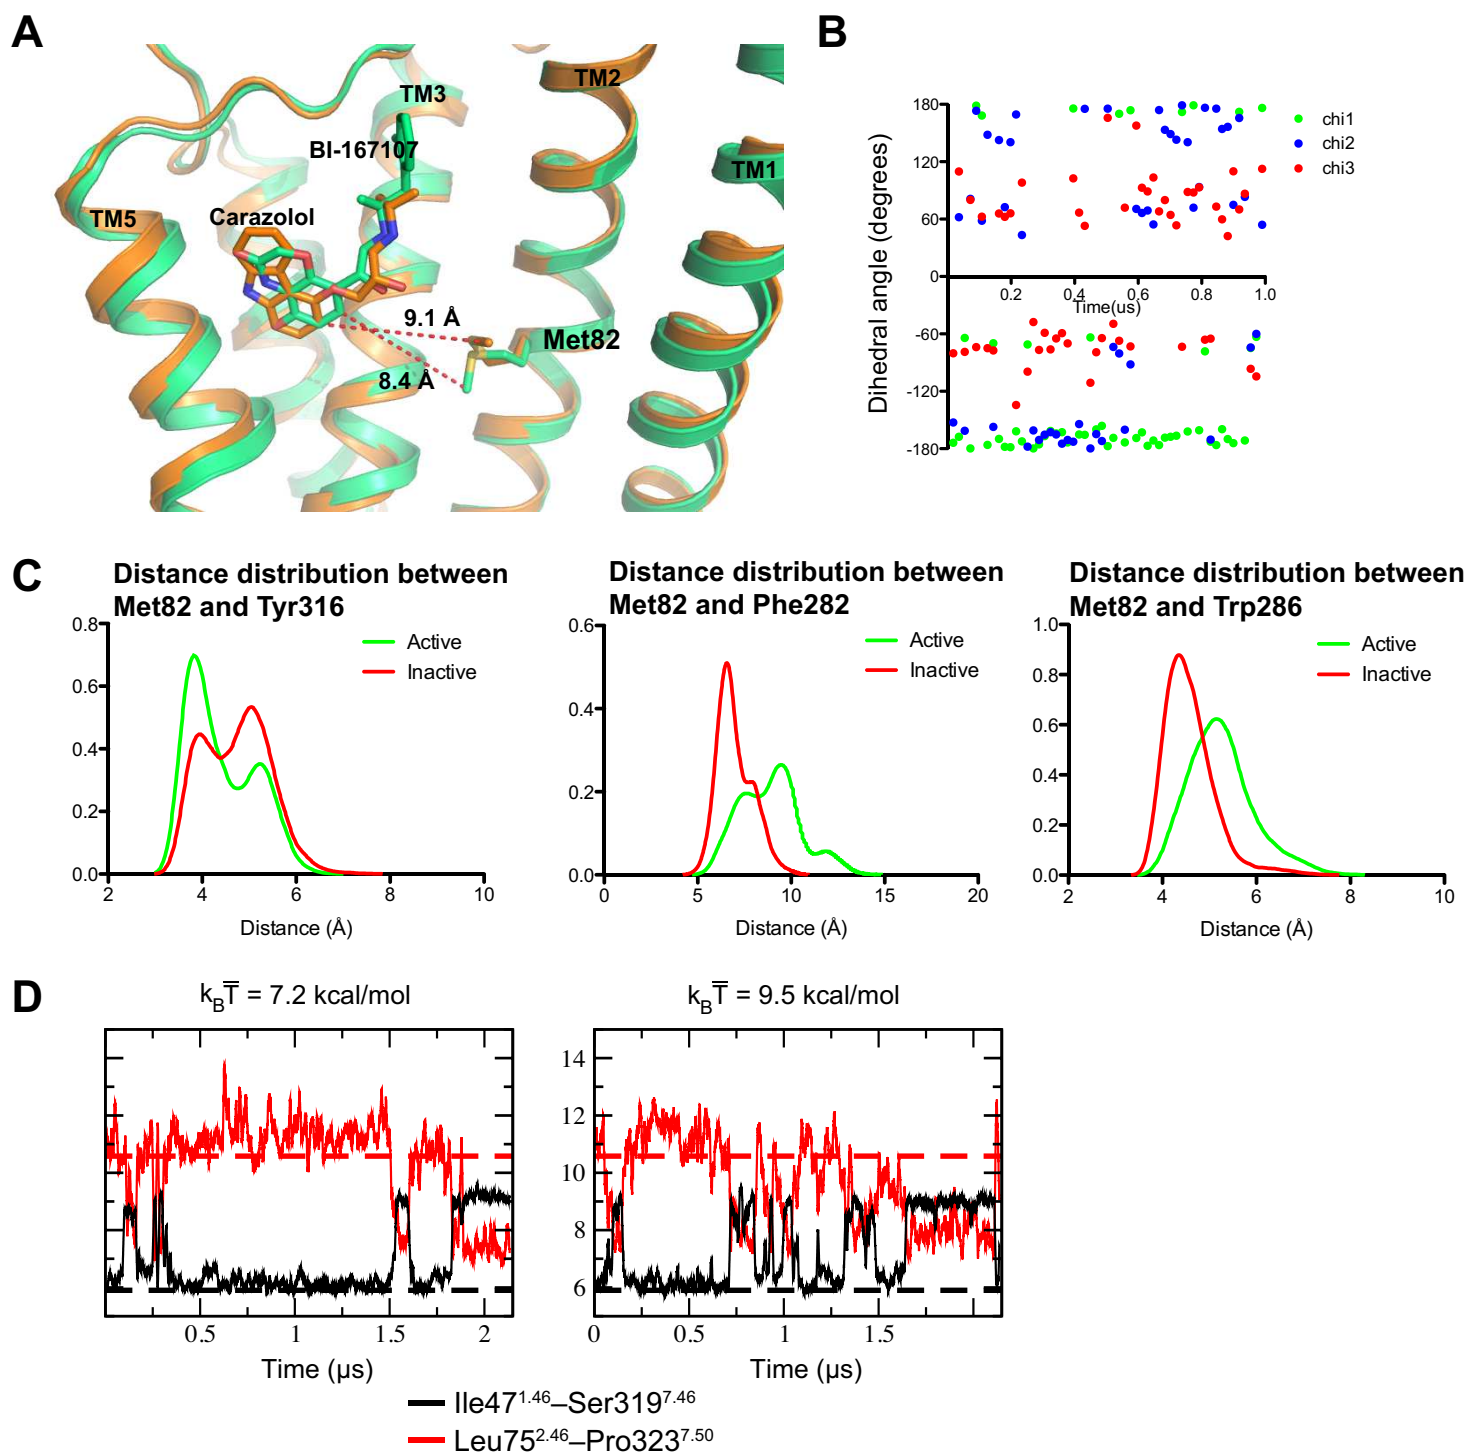

Figure S5

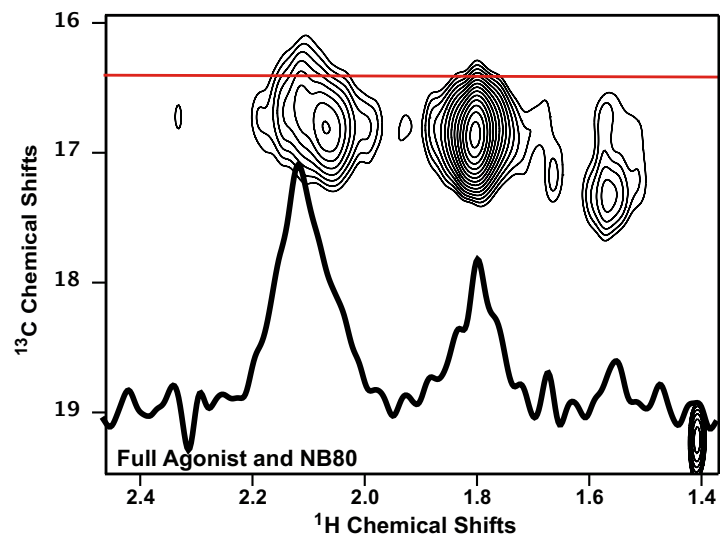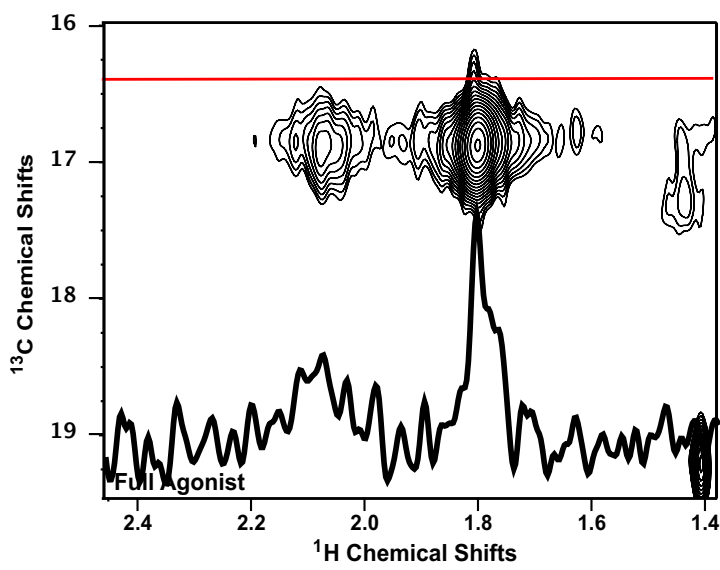

Supplement: NIHMS435059-supplement-02.pdf [file NIHMS435059-supplement-02.pdf]
